# Supplementary material for: 3′dNTP Binding Is Modulated during Primer Synthesis and Translesion by Human PrimPol
Source: MDPI journal article supplement (doi:10.3390/ijms25010051), 2023-12-19
Supplement: s1 [file s1]

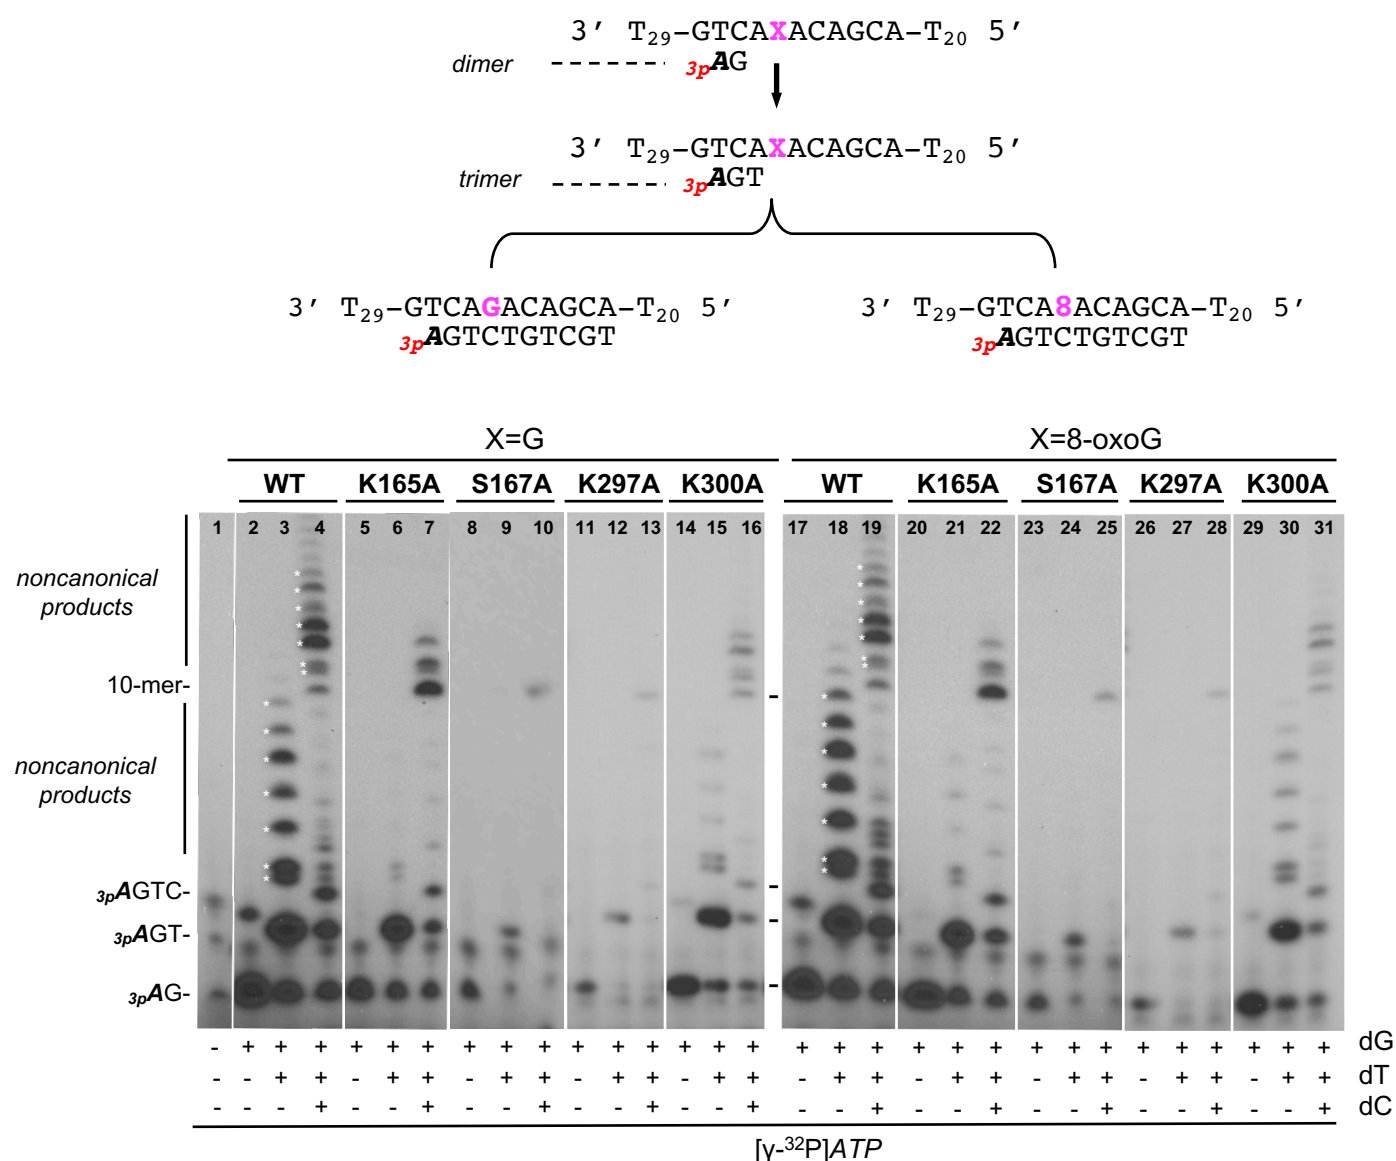

**Figure S1. Single mutations affecting 3' dNTP binding do not destroy the ability of *HsPrimPol* to tolerate an 8oxoG lesion.** Primer formation and elongation by WT *HsPrimPol* and mutants (400 nM) using 3' T<sub>29</sub>-GTCA $\textcolor{violet}{X}$ ACAGCA-T<sub>20</sub> 5' as a template, where X can be either a G (left panel) or an 8-oxoG lesion (right panel). [ $\gamma$ - $^{32}\text{P}$ ]ATP (16 nM) as the 5' nucleotide, and dGTP, dTTP and dCTP (100  $\mu\text{M}$ ) as the 3' incoming dNTPs were sequentially added, in the presence of 1 mM MnCl<sub>2</sub>; non-canonical products are marked by asterisks.

As previously reported *HsPrimPol* is well suited to tolerate 8-oxoG lesions (García-Gómez *et al.*, 2013 [3]; Martínez-Jiménez *et al.*, 2015 [34]), even during DNA primer synthesis (Díaz-Talavera, 2020 [33]). As shown here, *HsPrimPol* used equally well both dG- and 8-oxoG-containing templates (see the schematics) to start and elongate a DNA primer, giving rise to similar amounts of dimers, trimers, and fully elongated primers, and even non-canonical products. K300A mutant showed again a WT-like behavior when tolerating an 8-oxoG, producing similar canonical and non-canonical priming products (compare lanes 15-16 with 30-31). K165A, S167A, and K297A mutants could also tolerate 8-oxoG lesions during the priming reaction because longer products than 4-mer were observed, mirroring those on the control template (compare lines 7 *vs* 22, 10 *vs* 25, 13 *vs* 28). As expected, S167A and K297A mutants again synthesized a very limited and similar amount of product on both templates (compare lanes 10 & 25 (S167A), 13 & 28 (K297A) with lanes 4 & 19 (WT)).
